# Supplementary material for: The Neuropeptide Oxytocin Enhances Information Sharing and Group Decision Making Quality
Source: PubMed Central journal article supplement (PMC5225413; doi:10.1038/srep40622), 2017-01-11
Supplement: srep40622-s1.pdf [file srep40622-s1.pdf]

**Supporting Online Material for**

The Neuropeptide Oxytocin Enhances Information Sharing and Group Decision Making Quality

Tim R.W. de Wilde<sup>a,\*</sup>, Femke S. Ten Velden<sup>a</sup> & Carsten K.W. De Dreu<sup>b,c</sup>

<sup>a</sup>Department of Psychology, University of Amsterdam

<sup>b</sup>Institute of Psychology, Leiden University

<sup>c</sup>Center for Experimental Economics and Political Decision Making, University of Amsterdam

\*Corresponding Author: University of Amsterdam, PO Box 15919

1001 NK Amsterdam, The Netherlands. Email: [t.r.w.dewilde@uva.nl](mailto:t.r.w.dewilde@uva.nl)

## Additional Information on Methods and Results

### Discussion time and speaking turns

Discussion time was measured by the computer, and the number of speaking turns were counted from the discussion transcripts. Treatment did not influence discussion time ( $M_{OT}=21.01$  minutes,  $SD_{OT}=12.50$ ;  $M_{PL}=17.61$ ,  $SD_{PL}=10.51$ ),  $t(36)=-0.91$ ,  $p=.369$ , the number of speaking turns ( $M_{OT}=80.89$ ,  $SD_{OT}=39.52$ ;  $M_{PL}=69.47$ ,  $SD_{PL}=41.50$ ),  $t(36)=-0.87$ ,  $p=.391$ .

### Certainty, decision ease and agreement

Certainty (1=*very uncertain*; 7=*very certain*) was measured both before (relating to the individual decision participants made) and after group discussion (relating to the group's decision). In the post-task questionnaires participants also rated their agreement with the group decision (1=*strongly disagree*; 7=*strongly agree*) and how easy it was to reach a group decision (1=*very difficult*; 7=*very easy*).

Whereas intranasal administration of oxytocin enabled groups to better exchange and process information, this increase in quality was not reflected in post-discussion agreement with the group's decision,  $t(36)=0.74$ ,  $p=.467$ , or perceived ease of decision-making,  $t(36)=1.18$ ,  $p=.245$  (for Means and Standard Deviations, see Table S1). Finally, a 2(pre/post-discussion certainty) x 2(treatment) mixed-model Analysis of Variance (ANOVA) showed that group discussion increased decision certainty ( $M_{pre}=4.36$ ,  $SD=0.87$  to  $M_{post}=5.25$ ,  $SD=0.86$ ),  $F(1,36)=27.37$ ,  $p<.001$ ,  $\eta_p^2=.432$ ), with no effects involving treatment,  $F(1,36)=0.11$ ,  $p=.919$  (for Means and Standard Deviations, see S1).

### Mood

Both prior to the group's decision-making, and immediately after its completion, participants individually filled out the Positive-Affect Negative-Affect Scale (PANAS; Watson,

Clark & Tellegen, 1988). Participants indicated the extent to which they experienced certain feelings and emotions at that particular moment on 5-point scales (1=*very slightly or not at all*; 5=*extremely*). Emotions included ‘enthusiastic’ and ‘interested’ for the Positive Affect scale and ‘nervous’ and ‘afraid’ for the Negative Affect scale. Reliability was excellent for both the positive ( $\alpha_{\text{pre-task}}=.827$ ,  $\alpha_{\text{post-task}}=.872$ ) and the negative scale ( $\alpha_{\text{pre-task}}=.829$ ,  $\alpha_{\text{post-task}}=.856$ ).

Results of Repeated Measures ANOVA revealed that treatment was unrelated to positive and negative affect before and after the experimental task, all  $F$ s  $<.06$ ,  $p$ s  $>.488$ ; for Means and Standard Deviations, see Table S2.

### **Group identification, discussion thoroughness and focus on speed**

After the group discussion participants filled out a 14-item questionnaire about their identification with the group (e.g., “I am happy to be a member of my group”  $\alpha=.925$ ), a 7-item questionnaire on the thoroughness of the group discussion and information processing (e.g., “During the discussion we talked about a lot of information” and “We discussed the information thoroughly”;  $\alpha=.723$ ); and finally a 6-item questionnaire on the extent the group focused on reaching a decision quickly (e.g., “We tried to reach agreement as quickly as possible”;  $\alpha=.586$ ). For Means and Standard Deviations of the oxytocin and placebo groups, and tests of significance, see Table S3.

## References

- Hayes, A. F. (2013). *Introduction to Mediation, Moderation, and Conditional Process Analysis: A Regression-Based Approach*. New York: Guilford Press.
- Watson, D., Clark, L. A., & Tellegen, A. (1988). Development and validation of brief measures of positive and negative affect: the PANAS scales. *Journal of Personality and Social Psychology*, 54(6), 1063–70. <http://doi.org/10.1037/0022-3514.54.6.1063>

## Figures and Tables

|                                | Oxytocin      |      | Placebo       |      | CI <sub>95%</sub> * |                    |
|--------------------------------|---------------|------|---------------|------|---------------------|--------------------|
|                                | Mean (SD)     | SE   | Mean (SD)     | SE   |                     |                    |
| <b>Before group discussion</b> |               |      |               |      |                     |                    |
| Pre-discussion certainty       | 4.39 (0.66)   | 0.15 | 4.33 (1.07)   | 0.24 | -0.64               | 0.53               |
| <b>During group discussion</b> |               |      |               |      |                     |                    |
| Total information exchange     | 21.79 (11.54) | 2.65 | 15.95 (10.57) | 2.42 | -9.89               | 1.05               |
| Proportion unique information  | 0.49 (0.18)   | 0.04 | 0.34 (0.22)   | 0.05 | -0.28               | -0.02              |
| Repetition unique information  | 2.12 (0.61)   | 0.14 | 1.36 (0.97)   | 0.22 | -1.30               | -0.23 <sup>a</sup> |
| Repetition shared information  | 1.47 (0.43)   | 0.10 | 1.35 (0.36)   | 0.08 | -0.38               | 0.14 <sup>a</sup>  |
| <b>After group discussion</b>  |               |      |               |      |                     |                    |
| Post-discussion certainty      | 5.26 (0.85)   | 0.20 | 5.25 (0.89)   | 0.20 | -0.59               | 0.55               |
| Agreement with group decision  | 5.96 (0.72)   | 0.16 | 6.12 (0.60)   | 0.14 | -0.28               | 0.59               |
| Ease of group decision         | 3.11 (1.52)   | 0.35 | 3.68 (1.50)   | 0.34 | -0.41               | 1.57               |

Table S1

Means, SD's and SE's of process measures. \*95% Confidence interval of the mean difference.

<sup>a</sup>Ordinal variable, mean differences needs to be interpreted with caution.

|                      | Oxytocin    | Placebo     | CI <sub>95%</sub> * |
|----------------------|-------------|-------------|---------------------|
| Negative Affect Pre  | 2.82 (0.56) | 2.84 (0.44) | -0.34 0.38          |
| Positive Affect Pre  | 1.23 (0.23) | 1.29 (0.28) | -0.13 0.25          |
| Negative Affect Post | 3.02 (0.67) | 3.00 (0.59) | -0.44 0.39          |
| Positive Affect Post | 1.22 (0.27) | 1.35 (0.34) | -0.07 0.33          |

Table S2.

Means, SD's of the mood measures. \*95% Confidence interval of the mean difference.

|                         | Oxytocin    | Placebo     | t-test                        | CI <sub>95%</sub> * |
|-------------------------|-------------|-------------|-------------------------------|---------------------|
| Group Identification    | 4.17 (1.03) | 4.29 (1.15) | $t(112)=0.64, p=.522^\dagger$ | -0.27 0.54          |
| Discussion Thoroughness | 5.48 (0.82) | 5.13 (0.89) | $t(36)=-1.70, p=.098$         | -0.76 0.07          |
| Focus on Speed          | 3.83 (0.94) | 4.26 (0.86) | $t(36)=1.90, p=.065$          | -0.03 0.89          |

Table S3. Means, SD's and differences between conditions (t-test) of the Group Identification, Discussion Thoroughness, and Focus on Speed measures. All analyses were done with Mixed-Model analyses on the individual level data with a random intercept included to account for group membership. <sup>†</sup> For this variable, the random intercept was redundant, and this analysis is therefore equal to a t-test on the individual level data. \*95% Confidence interval of the mean difference.

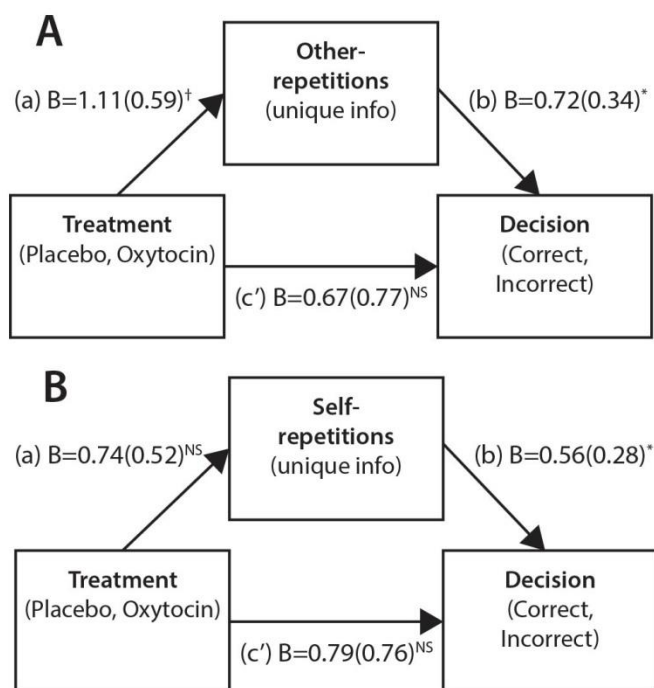

Fig S1.

Mediation Models. Mediation with other-repetition (A). SEs are between parentheses Estimates are based on bootstrapping procedure with 10,000 bootstrap samples. † $p < 0.10$ ; \* $p < 0.05$ . Used Process (Hayes, 2013) Model 4. Path (a)  $t(36) = 1.87, p = .070$ ; Path (b)  $Z(1) = 2.09, p = .037$ ; Path (c)  $Z(1) = 0.87, p = .384$ . Mediation model using self-repetition (B). SEs are between parentheses Estimates are based on bootstrapping procedure with 10,000 bootstrap samples. \* $p < 0.05$ . Used Process (Hayes, 2013) Model 4. Path (a)  $t(36) = 1.41, p = .17$ ; Path (b)  $Z(1) = 2.01, p = .044$ ; Path (c)  $Z(1) = 1.04, p = .301$ .
